# Supplementary material
Source: HighWire-hosted journal article supplement (https://jnm.snmjournals.org/highwire/filestream/97815/field_highwire_adjunct_files/0/241976_Supplemental_Data.pdf)
Supplement: 241976_Supplemental_Data.pdf [file 241976_Supplemental_Data.pdf]

**Supplemental Table S1.** Organ uptake of  $^{11}\text{C}$ -(*R*)-rolipram in MAS participants and healthy controls

| Organ              | AUC <sub>30-120</sub><br>(SUV · min) |                  | p value |
|--------------------|--------------------------------------|------------------|---------|
|                    | MAS<br>Participants                  | Controls         |         |
| <b>Bladder</b>     | 650.8<br>± 344.7                     | 575.1<br>± 402.2 | 0.784   |
| <b>Gallbladder</b> | 417.9<br>± 317.8                     | 581.2<br>± 235.8 | 0.467   |
| <b>Heart</b>       | 25.4<br>± 5.8                        | 27.4<br>± 6.1    | 0.640   |
| <b>Kidneys</b>     | 80.4<br>± 12.4                       | 63.3<br>± 14.8   | 0.128   |
| <b>Liver</b>       | 52.4<br>± 4.4                        | 47.6<br>± 21.7   | 0.682   |
| <b>Lungs</b>       | 9.6<br>± 4.4                         | 10.2<br>± 4.3    | 0.851   |
| <b>Spleen</b>      | 18.7<br>± 2.7                        | 20.1<br>± 2.8    | 0.510   |
| <b>Stomach</b>     | 34.1<br>± 22.8                       | 39.4<br>± 20.8   | 0.742   |

MAS = McCune-Albright syndrome; SUV = standardized uptake value;

AUC<sub>30-120</sub> (SUV · min) = the area-under-the-curve of the concentration of radioactivity vs time from 30 to 120 minutes versus concentration of radioactivity.

### Supplemental Figure S1

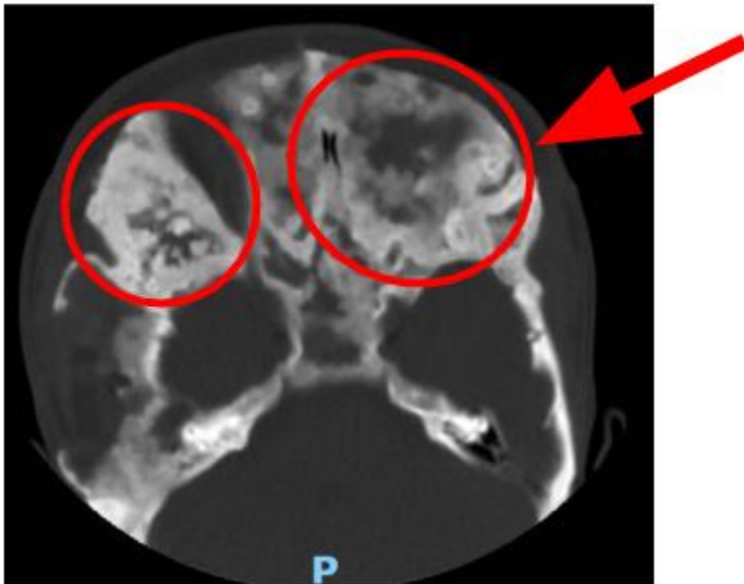

**Supplemental Figure S1.** Example CT cross section of McCune-Albright Syndrome (MAS) participant #1 showing areas of fibrous dysplasia.

## Supplemental Figure S2

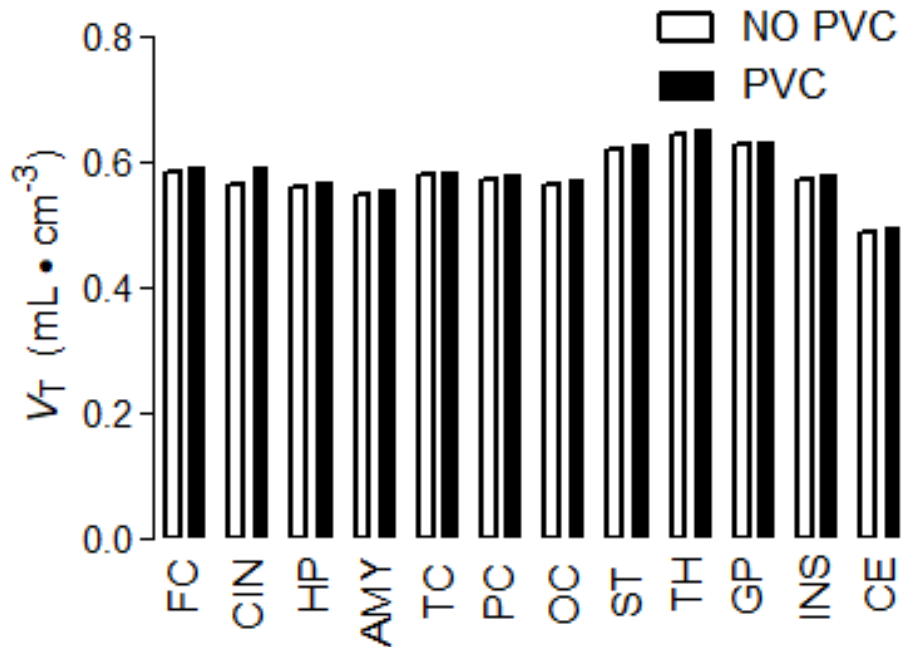

**Supplemental Figure S2.** The distribution volume ( $V_T$ ) of  $^{11}\text{C}$ -(*R*)-rolipram in twelve brain regions was the same with (black) and without (white) partial volume correction (PVC). FC = frontal cortex; CIN = cingulate; HP = hippocampus, AMY = amygdala; TC = temporal cortex; PC = parietal cortex; OC = occipital cortex; ST = striatum; TH = thalamus; GP = globus pallidus; INS = insula; CE = cerebellum.
